# Supplementary material for: Comparative DNA Methylome of Phytoplasma Associated Retrograde Metamorphosis in Sesame (Sesamum indicum L.)
Source: MDPI journal article supplement (doi:10.3390/biology11070954), 2022-06-23
Supplement: s1 [file s1]

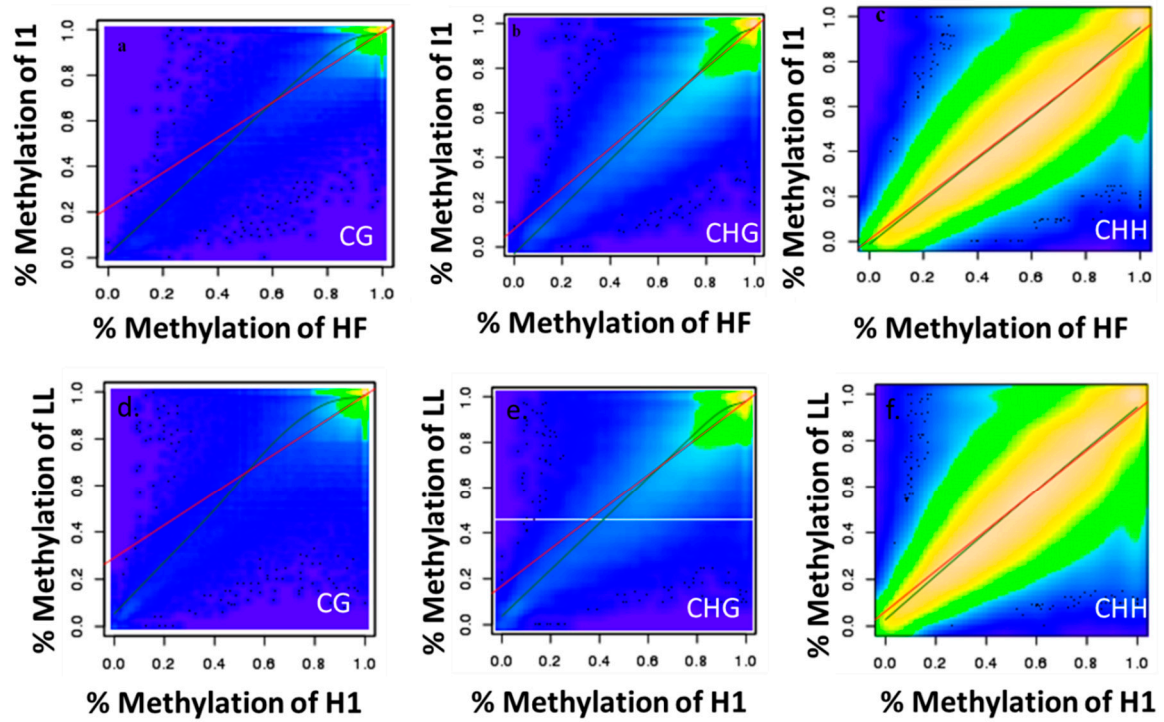

**Figure S1:** Scatter plots of percentage methylation values representing correlation between Phyllody (HF vs I1) (a, b and c) and Little Leaf (H1 vs LL) (d, e and f).

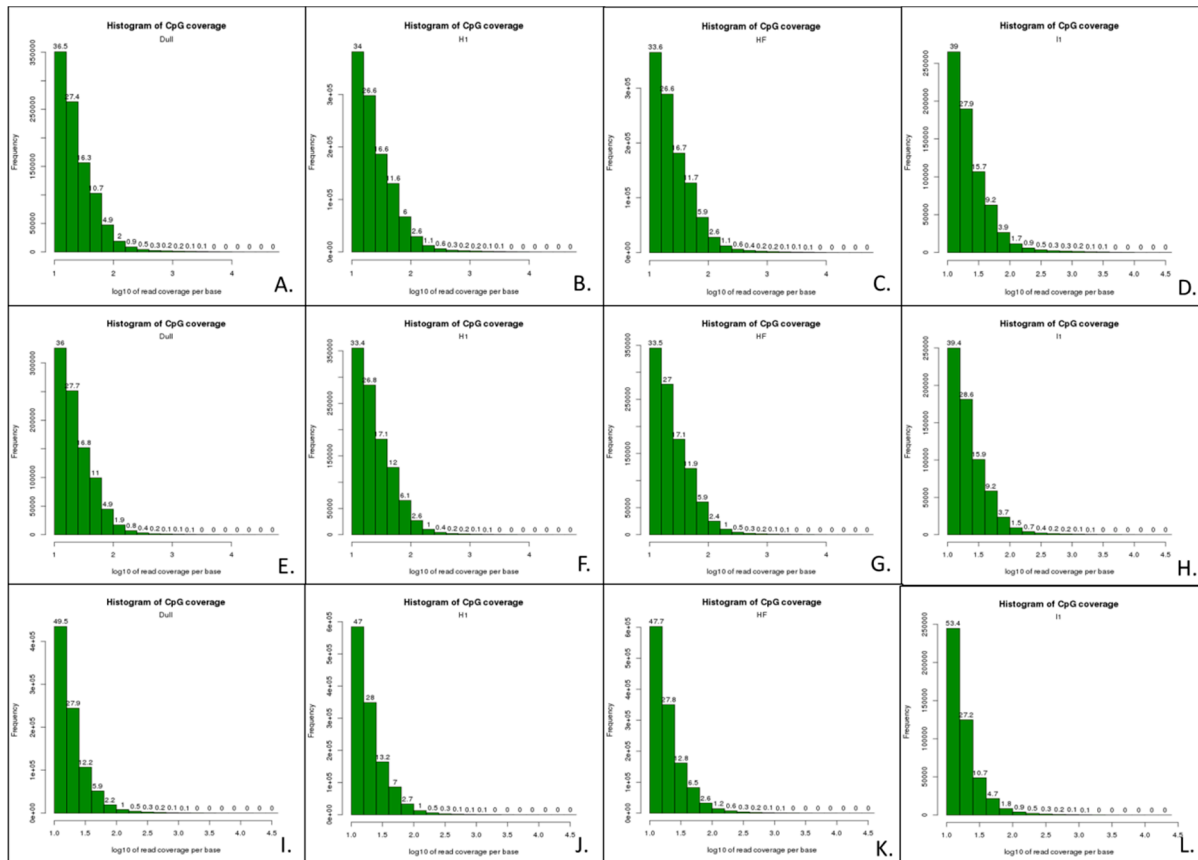

**Figure S2:** Read coverage per base in Healthy Flowering (HF), Phyllody affected (II), Healthy vegetative (H1) and Little Leaf (LL) affected sesame samples in CG context (A, B, C and D), CHG context (E, F, G and H) and CHH context (I, J, K and L).

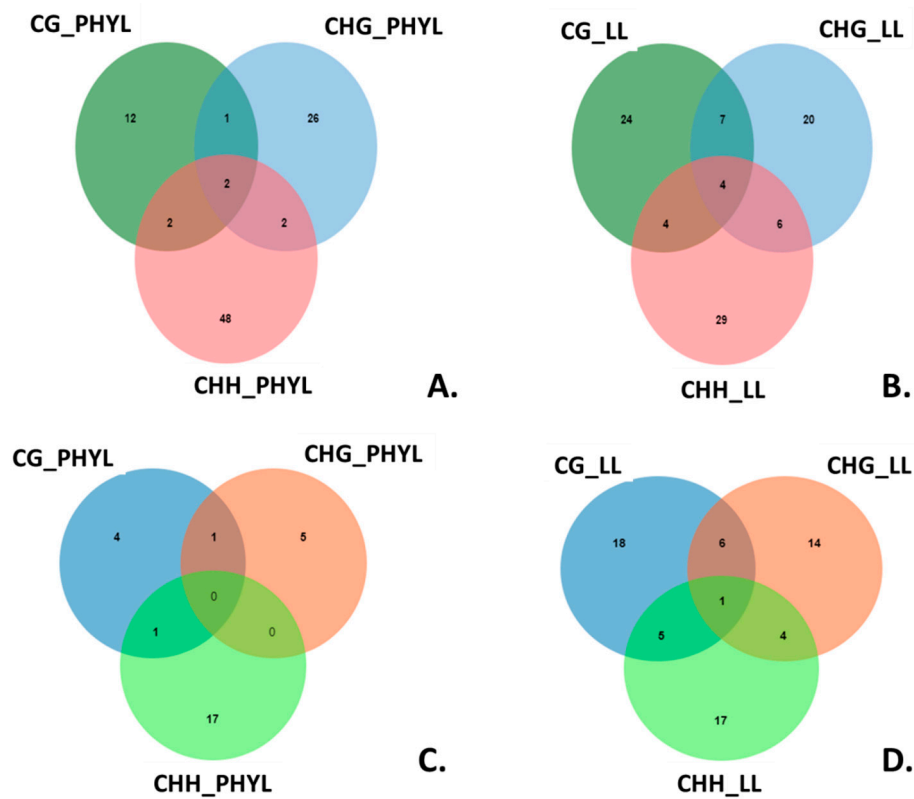

**Figure S3:** Venn diagram representing hypomethylated genes (A & B) and hypermethylated genes in PHYL and LL(C & D). PHYL-phyllody affected sesame, LL-little leaf affected sesame.

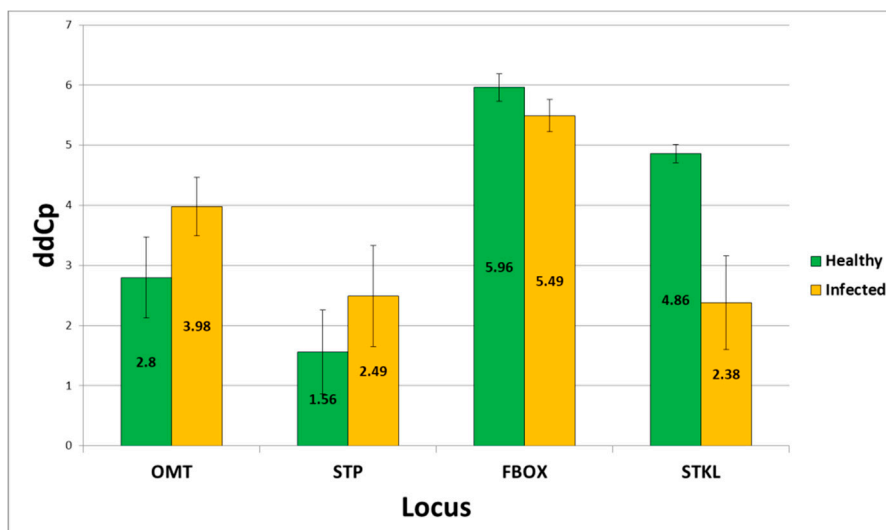

**Figure S4:**  $\Delta\Delta\text{CT}$  values of four loci namely, Probable O methyltransferase 3(OMT), serine/threonine-protein phosphatase 7 long form homolog(STP), FBOX-PP2-B15(FBOX) and STOREKEEPER protein-like(STKL) in healthy and phytoplasma infected samples. Actin was taken as endogenous control. Each point represents the mean value of three replications  $\pm$  SD.
