# Supplementary material for: Comparative DNA Methylome of Phytoplasma Associated Retrograde Metamorphosis in Sesame (Sesamum indicum L.)
Source: MDPI journal article supplement (doi:10.3390/biology11070954), 2022-06-23
Supplement: s1 [file s1]

**Table S1.** Correlation coefficient between Phyllody (HF vs I1) and Little Leaf (H1 vs LL) affected sesame.

| Context | Correlation coefficient |          |
|---------|-------------------------|----------|
|         | HF vs I1                | H1 vs LL |
| CG      | 0.76                    | 0.71     |
| CHG     | 0.83                    | 0.79     |
| CHH     | 0.87                    | 0.86     |

**Table S2.** Absolute and relative methylation percentage in HF-Healthy Flowering, I1-Phyllody, H1-Healthy vegetative and LL-Little Leaf sesame samples.

| Sample | Absolute Methylation percentage (%) | Relative Methylation percentage (%) |
|--------|-------------------------------------|-------------------------------------|
| HF     | 46.20                               | 66.32                               |
| I1     | 41.39                               | 35.11                               |
| H1     | 41.06                               | 64.09                               |
| LL     | 40.52                               | 52.55                               |

**Table S3.** Methylation level (%) of cytosines in different (CG, CHG and CHH) sequence contexts in HF-Healthy Flowering, I1-Phyllody, H1-Healthy vegetative and LL-Little Leaf sesame samples.

| Methylation level (%) | Percentage (%) of methylated cytosines |     |      |      |      |      |      |      |      |      |      |      |
|-----------------------|----------------------------------------|-----|------|------|------|------|------|------|------|------|------|------|
|                       | CG                                     |     |      |      | CHG  |      |      |      | CHH  |      |      |      |
|                       | H1                                     | LL  | HF   | I1   | H1   | LL   | HF   | I1   | H1   | LL   | HF   | I1   |
| 0-20                  | 0.4                                    | 0.4 | 0.3  | 0.3  | 0.6  | 0.5  | 0.4  | 0.5  | 9.3  | 9.1  | 10.1 | 10.2 |
| 20-40                 | 0.5                                    | 0.5 | 0.5  | 0.4  | 1.3  | 1.3  | 1.3  | 1.1  | 19.9 | 20.3 | 21.2 | 21.5 |
| 40-60                 | 0.9                                    | 0.8 | 1.0  | 0.8  | 3.5  | 3.6  | 3.6  | 3.7  | 24.9 | 25.6 | 25.3 | 27.2 |
| 60-80                 | 3.6                                    | 3.4 | 3.3  | 3.0  | 9.9  | 10   | 9.8  | 10.4 | 23.7 | 23.8 | 23.4 | 22.9 |
| 80-100                | 94.4                                   | 95  | 94.8 | 95.4 | 84.7 | 84.7 | 85.1 | 84.3 | 21.9 | 21.3 | 20.0 | 18.2 |

**Table S4.** Hyper and hypomethylated DMCs with methylation deference of more than 25% in different sequence contexts in Phyllody (HF vs I1) and Little Leaf (H1 vs LL) affected sesame.

| Context      | Filtered DMCs | Hyper methylated DMCs |            | Hypo methylated DMCs |            |
|--------------|---------------|-----------------------|------------|----------------------|------------|
|              |               | Number of DMCs        | Percentage | Number of DMCs       | Percentage |
| HF vs I1_CG  | 251           | 66                    | 26.29      | 185                  | 73.71      |
| HF vs I1_CHG | 348           | 86                    | 24.71      | 262                  | 75.29      |
| HF vs I1_CHH | 905           | 166                   | 18.34      | 739                  | 81.66      |
| TOTAL        | 1504          | 318                   | 21.14      | 1186                 | 78.86      |
| H1 vs LL_CG  | 1827          | 870                   | 47.62      | 957                  | 52.38      |
| H1 vs LL_CHG | 1649          | 744                   | 45.12      | 905                  | 54.88      |
| H1 vs LL_CHH | 2268          | 1059                  | 46.69      | 1209                 | 53.31      |
| TOTAL        | 5744          | 2673                  | 46.54      | 3071                 | 53.46      |
