# Supplementary material for: Comparative DNA Methylome of Phytoplasma Associated Retrograde Metamorphosis in Sesame (Sesamum indicum L.)
Source: Biology (Basel). 2022 Jun 23;11(7):954. doi: 10.3390/biology11070954 (PMC9311523; doi:10.3390/biology11070954)
Supplement: Supplementary file 1 [file biology-11-00954-s001.zip]

Archive with 6 entries (6 files):
- FigureS1.tif
- FigureS2.tif
- FigureS4.png
- FiguresS3.tif
- supplementary figures Biology special issue phytoplasma.pdf
- supplementary tables Biology special issue phytoplasma.pdf
